# Supplementary figures and images for: Super-hydrophilic and transparent thin films of TiO2 nanotube arrays by a hydrothermal reaction
Source: Royal Society of Chemistry journal article supplement (doi:10.1039/b700387k), 2007-01-01

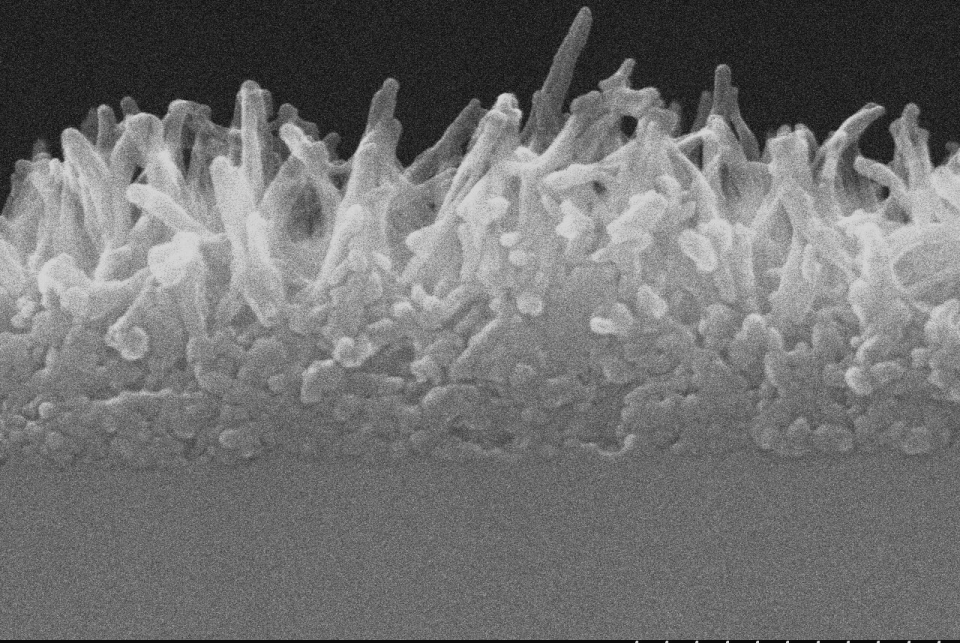

S-5200 15.0kV x80.0k SE

500nm

Supplement: b700387k.pdf [file b700387k.pdf]
